# Supplementary material for: Estimation of the applicability domain of kernel-based machine learning models for virtual screening
Source: Springer Nature journal article supplement (doi:10.1186/1758-2946-2-2), 2010-03-11

AD filtering effects on BEDROC performance

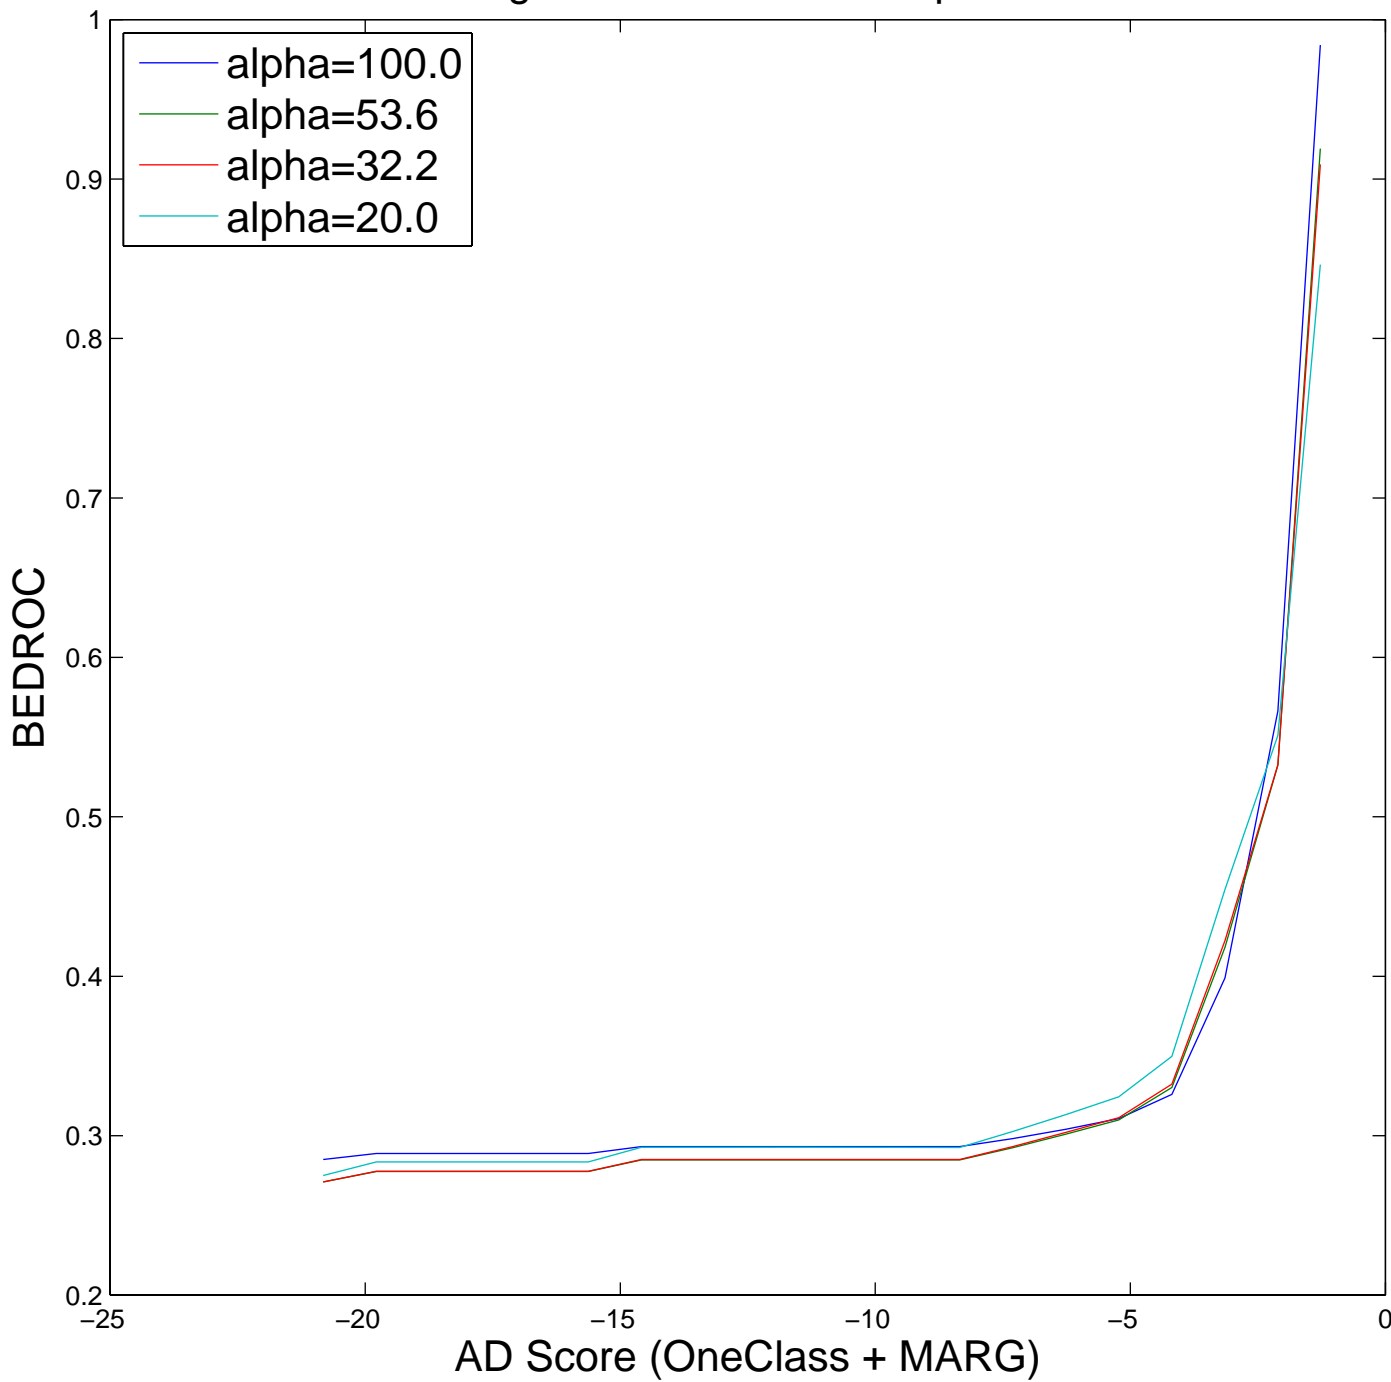

AD filtering effects on AUROC and compound count performance

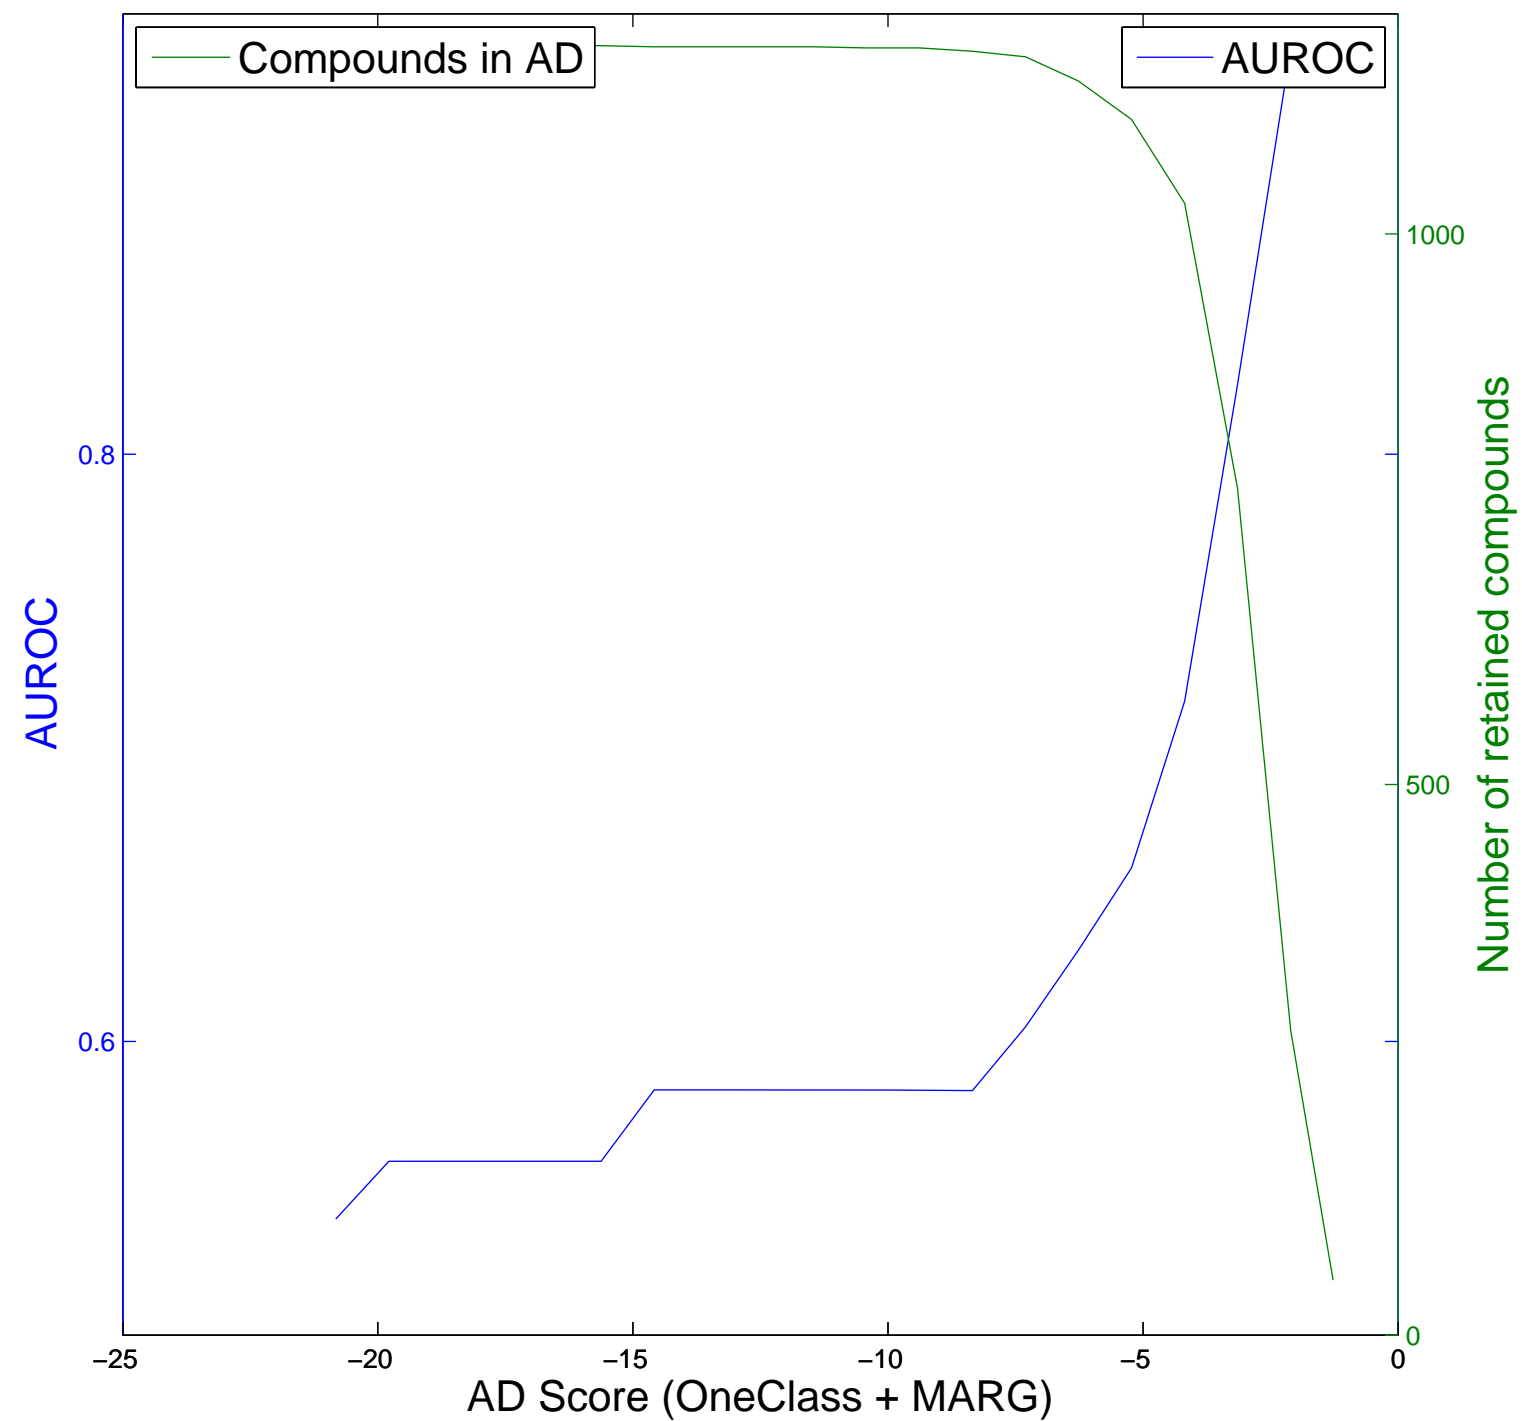

Supplement: 13321_2009_24_MOESM4_ESM.pdf [file 13321_2009_24_MOESM4_ESM.pdf]
