# Supplementary material for: Estimation of the applicability domain of kernel-based machine learning models for virtual screening
Source: Springer Nature journal article supplement (doi:10.1186/1758-2946-2-2), 2010-03-11

Optimal Assignment Kernel

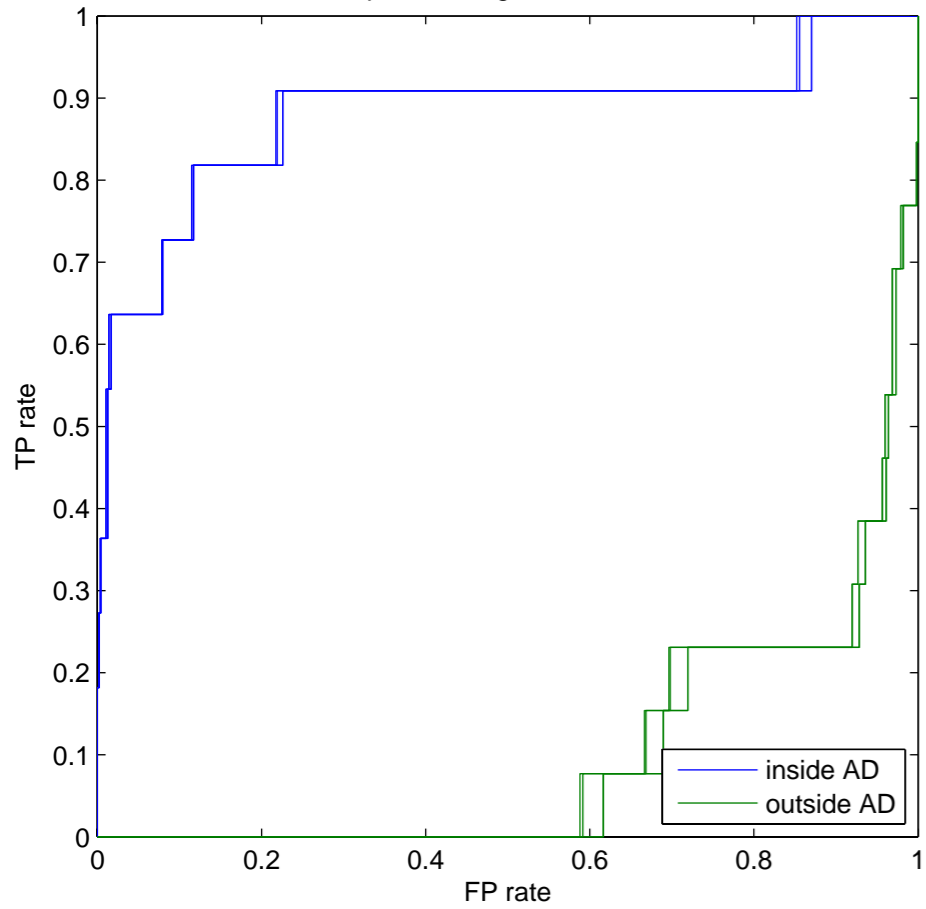

Flexible Optimal Assignment Kernel

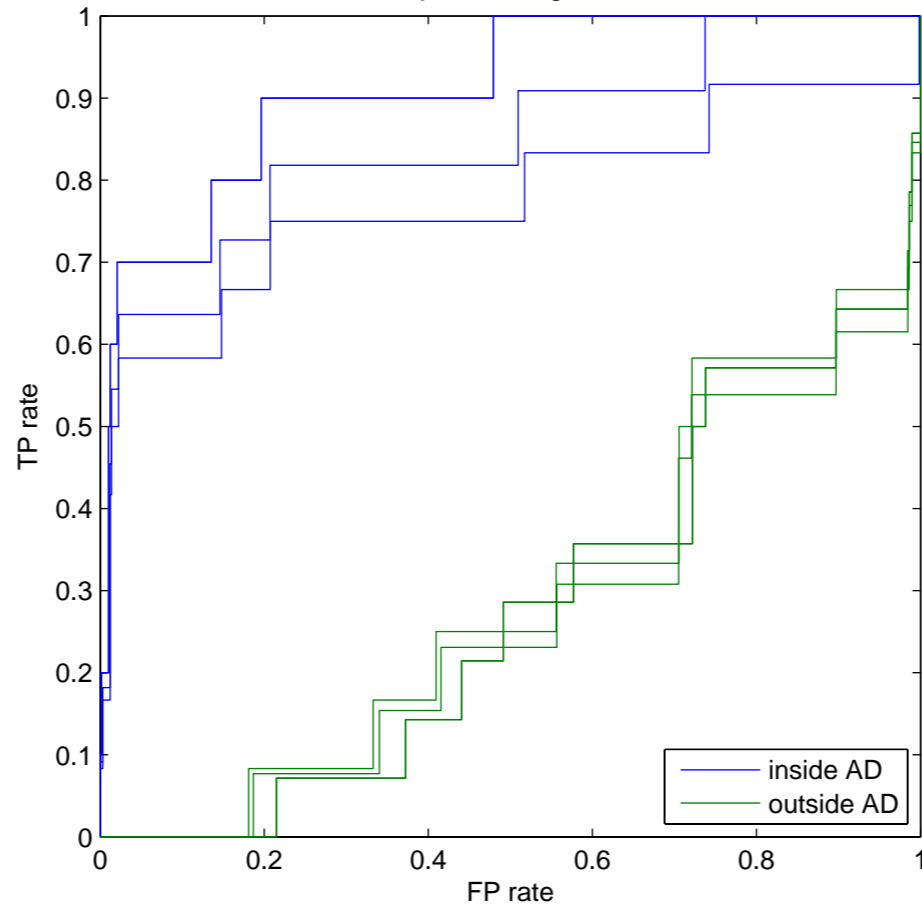

Marginalized Graph Kernel

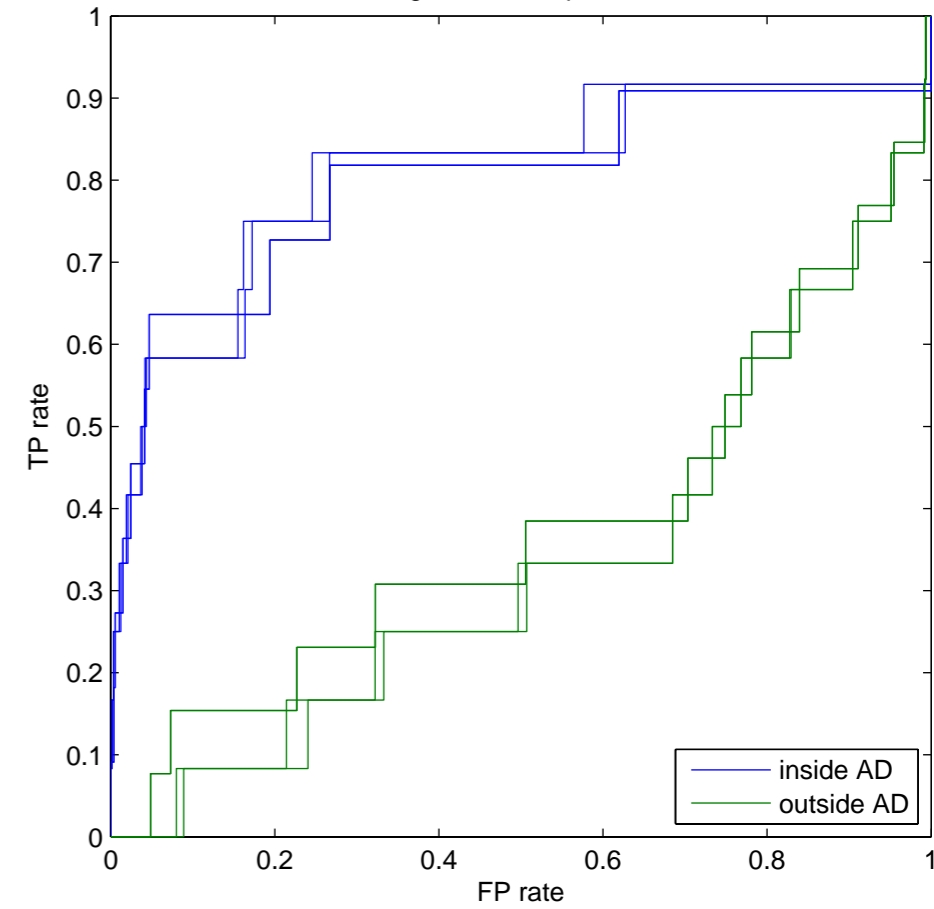

Supplement: 13321_2009_24_MOESM9_ESM.pdf [file 13321_2009_24_MOESM9_ESM.pdf]
